# Supplementary material
Source: PubMed Central journal article supplement (PMC3422629)
Supplement: NIHMS393626-supplement-01.pdf [file NIHMS393626-supplement-01.pdf]

# Extrathymic Generation of Regulatory T Cells in Placental Mammals Mitigates Maternal-Fetal Conflict

Robert M. Samstein,<sup>1</sup> Steven Z. Josefowicz,<sup>1</sup> Aaron Arvey,<sup>1</sup> Piper M. Treuting,<sup>2</sup> and Alexander Y. Rudensky<sup>1,\*</sup>

<sup>1</sup>Howard Hughes Medical Institute and Immunology Program, Memorial Sloan-Kettering Cancer Center, New York, NY 10065, USA

<sup>2</sup>Department of Comparative Medicine, University of Washington, Seattle, WA 98195, USA

\*Correspondence: rudenska@mskcc.org

<http://dx.doi.org/10.1016/j.cell.2012.05.031>

## SUMMARY

Regulatory T (Treg) cells, whose differentiation and function are controlled by X chromosome-encoded transcription factor *Foxp3*, are generated in the thymus (tTreg) and extrathymically (peripheral, pTreg), and their deficiency results in fatal autoimmunity. Here, we demonstrate that a *Foxp3* enhancer, conserved noncoding sequence 1 (CNS1), essential for pTreg but dispensable for tTreg cell generation, is present only in placental mammals. CNS1 is largely composed of mammalian-wide interspersed repeats (MIR) that have undergone retrotransposition during early mammalian radiation. During pregnancy, pTreg cells specific to a model paternal alloantigen were generated in a CNS1-dependent manner and accumulated in the placenta. Furthermore, when mated with allogeneic, but not syngeneic, males, CNS1-deficient females showed increased fetal resorption accompanied by increased immune cell infiltration and defective remodeling of spiral arteries. Our results suggest that, during evolution, a CNS1-dependent mechanism of extrathymic differentiation of Treg cells emerged in placental animals to enforce maternal-fetal tolerance.

## INTRODUCTION

The benefits of the adaptive immune system of vertebrates, which allows for highly efficient protection against invading pathogens, have come with a substantial trade-off due to overzealous, or “unwanted,” immune responses and associated inflammation caused by infectious agents, commensal microbiota, autoantigens, and fetal alloantigens during pregnancy in placental animals. Numerous mechanisms operating within the mammalian immune system cooperatively limit deleterious immune responses.

A subset of CD4<sup>+</sup> T cells known as regulatory T cells express the X chromosome-encoded transcription factor *Foxp3* and suppress inflammatory immune responses against “self” and foreign antigens in a variety of physiological and pathological

settings (Littman and Rudensky, 2010). Loss-of-function mutations in *Foxp3* result in congenital Treg cell deficiency and severe systemic immunopathology in both mice and humans, which reveal the vital role that these cells play in immune homeostasis (Chatila et al., 2000; Brunkow et al., 2001; Wildin et al., 2001; Fontenot et al., 2003). Depletion of Treg cells in normal mice also results in a fatal lympho- and myeloproliferative disorder with widespread inflammatory lesions (Kim et al., 2007). Analysis of CD4<sup>+</sup> T cells expressing a functional *Foxp3* reporter allele and a *Foxp3* reporter null allele showed that *Foxp3* is essential for suppressor function of Treg cells (Gavin et al., 2007; Lin et al., 2007).

Recent studies implicated Treg cells in suppression of different types of inflammatory responses during infection, autoimmunity, metabolic inflammation, tissue injury, autoinflammatory responses at barrier sites, and tumor immunity (reviewed in Josefowicz et al., 2012). In the thymus, some thymocytes expressing TCR with a heightened reactivity for “self” antigens upregulate *Foxp3* and differentiate into tTreg cells, whereas pTreg cell generation in the periphery occurs upon stimulation of naive CD4<sup>+</sup> T cells with high-affinity cognate TCR ligands in the presence of TGFβ and retinoic acid (Chen et al., 2003; Zheng et al., 2004; Kretschmer et al., 2005; Hall et al., 2011). A recent observation that an intronic *Foxp3* enhancer CNS1, which contains Smad3- and retinoic acid receptor (RAR)-binding sites, facilitates TGF-β-dependent *Foxp3* induction and pTreg cell differentiation but is dispensable for tTreg generation suggests that biological functions of these two Treg cell subsets are distinct (Zheng et al., 2010). Indeed, in contrast to fatal early-onset inflammatory lesions resulting from congenital Treg cell deficiency, selective pTreg cell paucity leads to a rather late onset allergic and asthma-like inflammation in the gut and lung (Josefowicz et al., 2012). Because the principal differences between these two Treg cell subsets are the location and type of antigen that facilitates their differentiation, tTreg cells are likely responsible for tolerance to self-antigens, whereas pTreg cells restrain immune responses to nonself antigens such as allergens, commensal microbiota, and food.

Pregnancy represents a physiological situation in which tolerance to paternal alloantigens is critical for successful reproduction of placental mammals. Treg cells have been suggested to play a role in pregnancy based on their increased

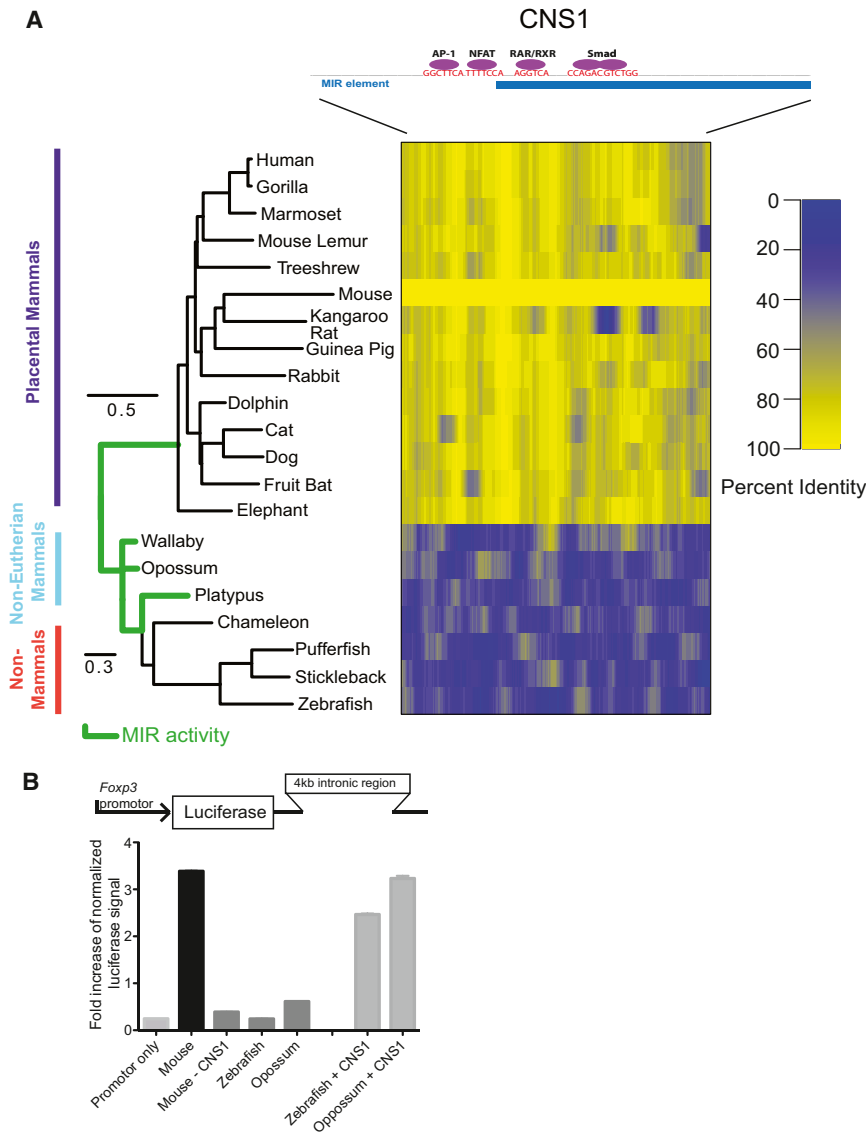

**Figure 1. *Foxp3* CNS1 Element Essential for Extrathymic Induction of Treg Cells Is Present Only in Placental Mammals**

(A) Schematic of the *Foxp3* CNS1 element and binding sites of transcription factors implicated in pTreg cell differentiation (not to scale). Overlap with annotated MIR retrotransposon is indicated. Phylogenetic tree of vertebrates with spatial conservation of CNS1 is shown as percent identity smoothed across a 15 bp window. Scale bars are noted, and branches with presumed MIR activity are denoted in green.

(B) Luciferase assay of enhancer activity performed in EL-4 cells using *Foxp3* 4 kb fragments, including the first intron of the *Foxp3* locus from indicated species inserted downstream of the mouse *Foxp3* promoter and luciferase (*Luc*) gene (schematic above). Error bars represent standard error; n = 3.

pTreg-cell-mediated suppression might represent such a mechanism.

In support of this hypothesis, here we show that CNS1 enhancer is present only in eutherian mammals and that CNS1-dependent generation of pTreg cells during allogeneic pregnancy in mice plays an important role by preventing embryo resorption and associated defective spiral artery remodeling with accumulation of activated T cells in the placenta. Our results suggest that extrathymic generation of regulatory T cells emerged during evolution as a means of mitigation of maternal-fetal allogeneic conflict.

**RESULTS**

**CNS1 Emerges in Placental Mammals**

Extrathymic induction of *Foxp3* and pTreg differentiation is facilitated by

numbers in pregnant mice and humans (Somerset et al., 2004). Antibody-mediated depletion of CD25<sup>+</sup> Treg cells results in increased resorption of the embryos in allogeneic matings in mice (Aluvihare et al., 2004; Shima et al., 2010), and women with repeated spontaneous abortions and pre-eclampsia display decreased numbers of CD25<sup>+</sup>CD4<sup>+</sup> Treg cells (Munoz-Suano et al., 2011; Winger and Reed, 2011). These studies left open a question as to whether a role for Treg cells during pregnancy is largely due to their general “housekeeping” role in immune homeostasis and the observed modulation in their numbers is secondary to altered immune balance or whether there is an evolutionary selected mechanism of Treg-cell-mediated maternal-fetal tolerance. We hypothesized that, given the capacity of pTreg cells to mediate tolerance against nonself antigens, mechanisms supporting their generation arose to mitigate maternal-fetal conflict caused by the immune response to paternal alloantigens in placental mammals. We reasoned that

*Foxp3* CNS1 enhancer, which contains binding sites for transcription factors activated downstream of three major signaling pathways that have been implicated in this process (Tone et al., 2008; Xu et al., 2010) (Figure 1A). Thus, to test the hypothesis that pTreg differentiation may have been gained during evolution to assist tolerance to the fetus, we examined the conservation of the CNS1 element in a variety of vertebrates for which annotated genome sequences are available. Though we observed that CNS1 is highly conserved throughout placental mammals, no evidence of a CNS1 sequence homolog was found within 100 kb of the transcription start site of any forkhead family member in the monotreme platypus, in marsupials wallaby and opossum, or in nonmammals such as zebrafish (Figure 1A) (Margulies et al., 2007). Importantly, a *Foxp3* homolog was previously identified in zebrafish, and its forced expression in mouse *Foxp3*<sup>-</sup> CD4<sup>+</sup> T cells conferred suppressive capacity (Quintana et al.,

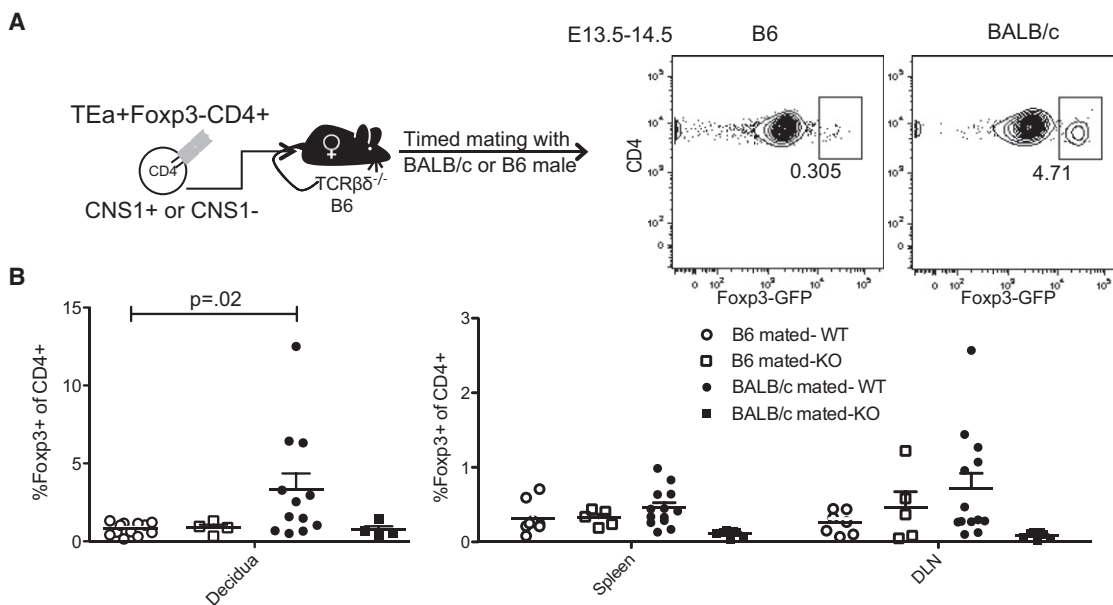

**Figure 2. CNS1-Dependent Generation of pTreg Cells Specific for Fetal Alloantigen during Pregnancy**

(A) Schematic diagram of experimental design with representative flow cytometric analysis of Foxp3 expression in CNS1-sufficient T cells in deciduas of pregnant TCRβδ<sup>-/-</sup> recipient females.

(B) Percent of CD4<sup>+</sup> cells that express Foxp3 in indicated tissues on days E13.5–E14.5 of pregnancy in TCRβδ<sup>-/-</sup> mice transferred with CNS1-sufficient (WT) or -deficient (KO) TEa Foxp3-negative CD4<sup>+</sup> T cells and mated with B6 or BALB/c males. Error bars indicate SE.

2010). These results led us to consider that species without identifiable *Foxp3* CNS1 sequence homologs lack a proximal regulatory element conferring efficient TGF-β-mediated Foxp3 induction, a key factor in pTreg differentiation. To test this notion we cloned 4 kb regions downstream of the promoter of the zebrafish, opossum, and mouse *Foxp3* genes (*Foxp3*-4kb) and evaluated their enhancer activities upon TCR-(PMA/ionomycin) and TGF-β induced activation of the *Foxp3* promoter in EL-4 cells in a luciferase assay previously used for the assessment of CNS1 enhancer activity (Figure 1B) (Tone et al., 2008). Indeed, only mouse, but not zebrafish or opossum, *Foxp3*-4kb sequence markedly augmented the *Foxp3* promoter activity. Furthermore, mouse *Foxp3*-4kb sequence devoid of CNS1 was lacking enhancer activity, whereas incorporation of CNS1 into zebrafish or opossum *Foxp3*-4kb sequence reconstituted enhancer activity. Though the remote possibility remains that, in noneutherians, TGF-β can facilitate Foxp3 induction in a species-specific manner, these results support the idea that CNS1-like enhancer activity, a prerequisite for pTreg differentiation, arose in placental mammals.

Interestingly, the majority of the CNS1 element sequence was contained within an annotated SINE retrotransposon of the mammalian-wide interspersed repeat (MIR) family (Figure 1A), suggesting a mechanism for the abrupt emergence of CNS1 in the *Foxp3* locus, because the MIR family is thought to have been amplified during the Mesozoic era in the course of the radiation of placental mammals, marsupials, and monotremes (Jurka et al., 1995; Smit and Riggs, 1995).

### Extrathymic Generation of Fetal Alloantigen-Specific Treg Cells in Pregnancy

To test whether pTreg cells that are specific for paternal alloantigen are generated during pregnancy in a CNS1-dependent manner, we used CNS1-sufficient and -deficient *Foxp3*<sup>GFP</sup> mice expressing transgenic (tg) TEa TCR that recognizes Eα52–68 peptide derived from I-E<sup>d</sup> molecule bound to MHC class II molecule I-A<sup>b</sup> (Grubin et al., 1997). This complex is highly expressed in H-2<sup>bxd</sup> (B6 × BALB/c) F1 mice yet is absent in either parental strains because B6 do not express antigenic peptide donor, whereas BALB/c mice lack the appropriate presenting molecule I-A<sup>b</sup>. FACS-purified Foxp3<sup>-</sup> CD4<sup>+</sup> T cells from CNS1-deficient and -sufficient TEa tg *Foxp3*<sup>GFP</sup> B6 mice were transferred into T-cell-deficient B6 recipients, which were subsequently mated with BALB/c (H-2<sup>d</sup>) or B6 (H-2<sup>b</sup>) male. In this experimental setup, TEa cells were able to recognize endogenous Eα52–68:I-A<sup>b</sup> complex presented by antigen-presenting cells (APC) of the embryo (H-2<sup>dxb</sup>) or processed by maternal APC only when recipient B6 females were mated with a BALB/c male (Figure 2A). Induction of Foxp3 in transferred CNS1-sufficient (WT) TEa T cells was observed primarily in the draining lymph node (DLN) and in decidua of females mated with BALB/c, but not B6 males. In contrast, no significant induction of Foxp3 was observed upon transfer of CNS1-deficient (KO) TEa T cells (Figure 2b). Although we cannot formally exclude the possibility that, under a particular condition, extrathymic Treg cells can be generated in the absence of CNS1, these results demonstrate that pTreg cells that are specific for fetal alloantigens are generated during pregnancy in a CNS1-dependent manner.

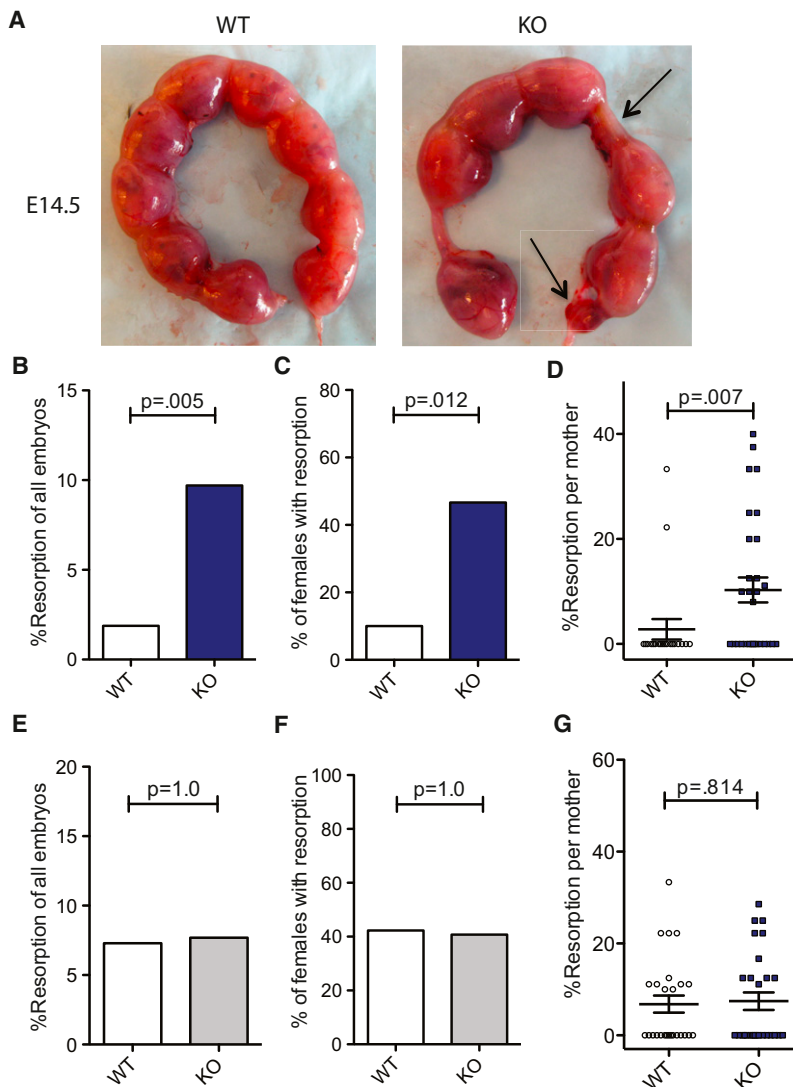

### pTreg Cell Paucity Results in Increased Resorption of Fetuses

A role for CNS1 and extrathymic generation of Treg cells in maternal-fetal tolerance and fertility was then directly assessed. CNS1-deficient (KO) and -sufficient (WT) B6 females were mated with allogeneic BALB/c males, and the embryo resorption was assessed on embryonic day 13.5–14.5 (E13.5–E14.5) (Figure 3A). Increased resorption was observed in CNS1-deficient females compared with the wild-type littermate controls (Figure 3B). Incidence of resorption and its rate per pregnant female were also increased (Figures 3C and 3D). Consistent with evolutionary pressure for the emergence of CNS1-dependent pTreg cell differentiation, the number of nonresorbed fetuses was also significantly decreased in CNS1-deficient females (Figure S1 available online). Importantly, females impaired in pTreg cell generation did not show increased resorption of embryos sired by B6 males expressing syngeneic MHC allele (Figures 3E–3G). The latter observation indicates that CNS1-deficient

### Figure 3. CNS1 Deficiency Results in Increased Resorption of Embryos

(A) Macroscopic evaluation of resorption of allogeneic embryos in uteri of CNS1-sufficient (WT) and -deficient (KO) mice on day E14.5. Arrows indicate resorptions. Representative of 20–30 females is shown. (B) Percent of resorbed embryos in all CNS1-sufficient and -deficient pregnancies with BALB/c males. Two-sided Fisher's exact test was used to assess the significance. (C) Incidence of pregnancies with at least one resorption. Two-sided Fisher's exact test was used to assess the significance. (D) Percent resorption observed in individual mothers with indicated genotype. Error bars indicate SE. (E) Percent of embryos resorbed in pregnant CNS1-sufficient and -deficient B6 mice mated with B6 males. (F) Incidence of pregnancies with at least one resorption. (G) Percent resorption observed in individual mothers. Error bars indicate SE. See also Figure S1.

females are not generally predisposed to spontaneous abortion but reject embryos expressing mismatched MHC alleles. CNS1-deficient females were always compared to their WT counterparts in identical breedings with syngeneic or allogeneic males to ensure that the genetic make-up of the embryos is the same in the two groups compared, as different strains of mice can vary in rates of embryo loss due to early fetal death unrelated to immunologic conflicts and because F1 embryos are frequently more robust and survive better.

To exclude potential effects of congenital pTreg cell deficiency, we generated heterozygous *Foxp3*<sup>CNS1KO/DTR</sup> females containing one CNS1 KO allele and one *Foxp3*<sup>DTR</sup> allele. Due to random X chromosome inactivation, half of the cells in a *Foxp3*<sup>CNS1KO/DTR</sup> mouse express each allele and are either susceptible to DT-mediated ablation (*Foxp3*<sup>DTR</sup>) or unable to

induce *Foxp3* in the periphery (*Foxp3*<sup>CNS1KO</sup>). Administration of DT allows for depletion of all CNS1-dependent pTreg cells while sparing a pool of CNS1-deficient tTreg cells (Figure S2). Treatment with DT before and during pregnancy in these mice resulted in increased resorption compared to control heterozygous *Foxp3*<sup>GFP/DTR</sup> females in which DT ablation leaves CNS1-sufficient *Foxp3*<sup>+</sup> Treg cells (Figure 4A). The observed increases were similar to those observed in intact CNS1-deficient females. Thus, acute pTreg ablation during allogeneic pregnancy results in increased embryo resorption comparable to that observed in CNS1-deficient females.

### Extrathymically Generated Treg Cells Play a Predominant Role in Maternal-Fetal Tolerance

Although analysis of allogeneic pregnancy in CNS1-deficient and *Foxp3*<sup>CNS1KO/DTR</sup> females suggested that pTreg cells generated in a CNS1-dependent manner prevent “rejection” of MHC-mismatched fetuses, it was possible that their contribution to

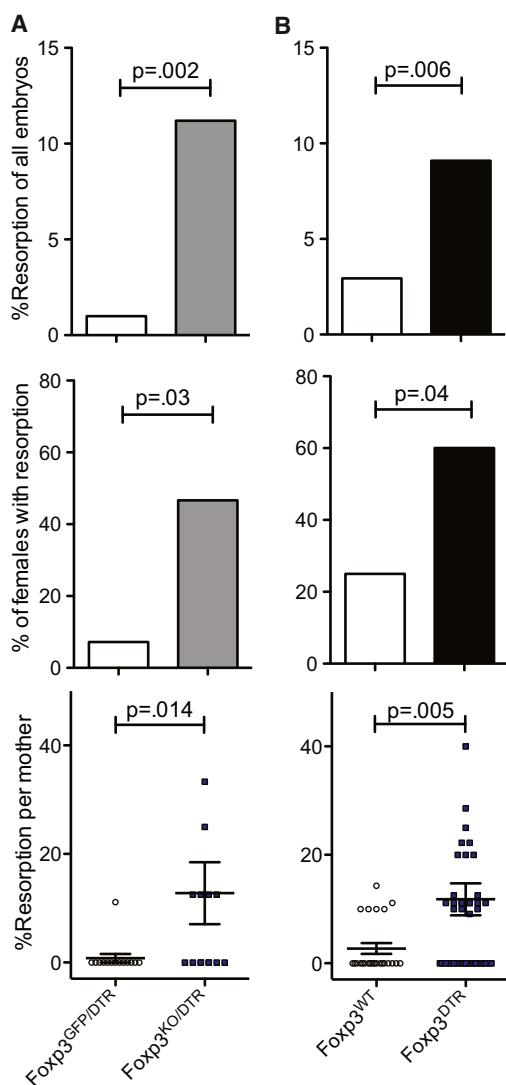

**Figure 4. Acute Depletion of pTreg and All Treg Cells Results in Comparable Increase in Embryo Resorption**

(A) Percent of embryos resorbed in pregnant *Foxp3<sup>GFP/DTR</sup>* or *Foxp3<sup>CNS1KO/DTR</sup>* females treated with DT continuously starting 3 days prior to mating with BALB/c males; incidence of pregnancies with at least one resorption; percent resorption observed in individual mothers. Error bars indicate SE.

(B) Percent of resorbed embryos, incidence of resorption, and percent resorption per mother for wild-type or *Foxp3<sup>DTR</sup>* B6 mice mated with BALB/c males and treated with DT on days E5.5 and E7.5.

See also Figure S2.

overall Treg cell-mediated suppression of maternal-fetal allogeneic conflict was relatively minor. To address this question, we assessed the effect of essentially complete ablation of Treg cells in pregnant *Foxp3<sup>DTR</sup>* B6 females expressing diphtheria toxin receptor under control of the endogenous *Foxp3* locus (Kim et al., 2007). Increased resorption of MHC-mismatched embryos was observed in *Foxp3<sup>DTR</sup>* B6 females, compared with control B6 mice, when mated with BALB/c males and treated with diphtheria toxin (DT) at days E5.5 and E7.5 (Figure 4B). In contrast to selective pTreg deficiency, DT-mediated combined ablation of

pTreg and tTreg cells also increased resorption of syngeneic embryos, most likely due to a loss of restraint of T cell reactivity against self-antigens (data not shown). Despite widespread immune mediated inflammation and lympho- and myeloproliferative syndrome in pregnant *Foxp3<sup>DTR</sup>* females subjected to “wholesale” Treg ablation, the rates of resorption observed in these mice were similar to those in CNS1-deficient females and upon acute ablation of pTreg cells. These findings indicate that pTreg cells play a predominant role in maternal-fetal tolerance.

### CNS1-Deficient Females Exhibit Signs of Inflammation and Abnormal Spiral Artery Remodeling

Consistent with the impaired pTreg induction during allogeneic pregnancy in CNS1-deficient females, we observed markedly reduced Treg cell numbers in the decidua in these mice mated with BALB/c males (Figure 5A). Proliferative activity assessed by Ki67 expression was not increased in Treg cell subsets in the decidua and DLN in CNS1-deficient mice in comparison to CNS1-sufficient controls (Figure S3). These results suggested that paucity of pTreg cells is not associated with compensatory expansion of tTreg cells, in agreement with our recent observation (Josefowicz et al., 2012). The observed decrease in the Treg cell population inversely correlated with the increased presence of activated effector CD62L<sup>lo</sup>CD4<sup>+</sup> T cells (Figure 5B); however, no significant changes in effector cytokine production were detected in the DLN or decidua (Figure S4). It must be noted that fluid composition and activation state of immune cells in a rapidly changing placental environment could mask potential differences. Histologic examination of the placentas of CNS1-deficient and -sufficient females performed in a blinded fashion showed that the genotype of the dams can be accurately predicted by the morphological status of the decidual spiral arteries; although there was some variability between individual placentas in any one uterus, CNS1-deficient placentas exhibited more prominent clusters of thickened blood vessels as compared to CNS1-sufficient littermate controls (Figure 5C). At day E13.5, placentas of surviving embryos of CNS1-deficient females exhibited early necrosis of spiral arteries and edema, whereas resorptions were characterized by embryo loss with necrotic labyrinths (Figure 5D). Presumptive early resorption sites exhibited necrosis or thrombosis of decidual vessels and edema in the placentas and embryos (Figure S5). Consistent with the immune-mediated pathology, more prominent T cell presence was noted in CNS1-deficient placentas, where single T cells were scattered within all layers of the placenta with clusters prominent in the decidua near spiral arteries (Figure 5E). In contrast, only rare single T cells were observed in CNS1-sufficient placentas, and no major changes in the numbers of B cells and macrophages were detected (Figure S5). These observations are indicative of an inflammatory pathology associated with allogeneic pregnancy in CNS1-deficient females resembling that of human pregnancy-associated disorders such as preeclampsia (Redman and Sargent, 2005; Renaud et al., 2011).

### DISCUSSION

Over the last decade, numerous studies have led to the realization that suppressive function of Treg cells extends far beyond

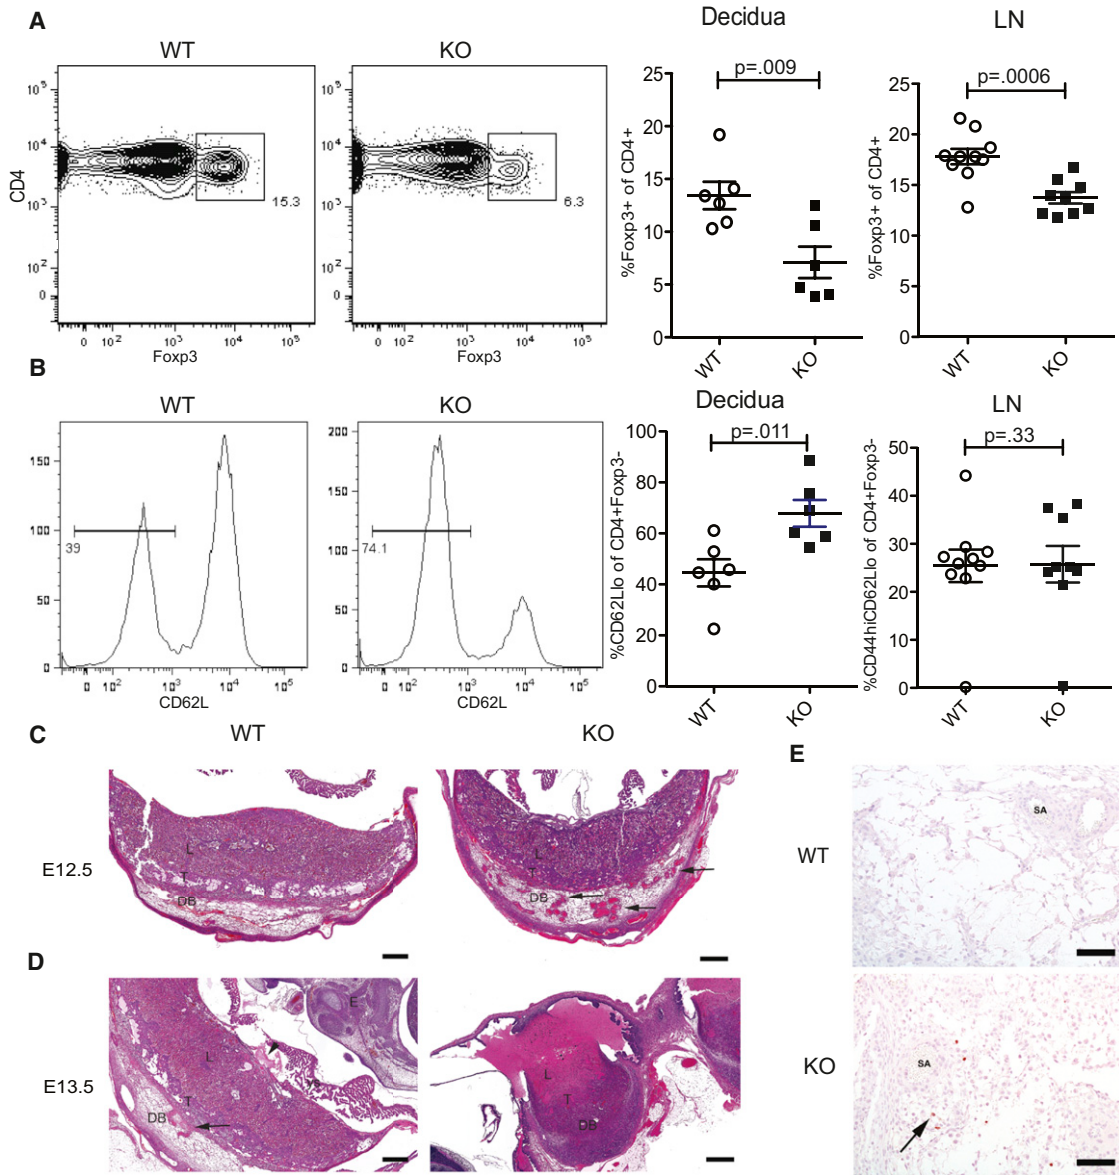

**Figure 5. Decreased Treg Cell Numbers and Histological Features of Immune-Mediated Resorption in Deciduas of CNS1-Deficient Female Mice**

(A) Representative flow cytometric analysis of Fopx3<sup>+</sup> Treg cells in decidua and analysis of decidua and lymph nodes (LN) of CNS1-sufficient (WT) and -deficient (KO) mice mated with BALB/c males and analyzed on days E13.5–E14.5. Error bars indicate SE; n = 8–12.

(B) Representative flow cytometric analysis of activated CD62L<sup>lo</sup> Fopx3-negative CD4<sup>+</sup> T cells within the decidua and analysis of decidua and LN.

(C) Histopathological evaluation of placentas from WT (left) and CNS1 KO (right) females mated with BALB/c males; low-power magnification survey of representative sections of H&E stained placenta. The maternal spiral arteries (SA) are more frequently clustered and prominent in KO placenta at day E12.5 (arrows, upper-right) (representative of 6–8 mice analyzed per group with 4–10 placental sites each).

(D) Analysis of H&E stained sections of the KO placentas at day E13.5; early necrosis of SA (arrow, left) in the decidua (DB) and edema (arrowhead, left) at the chorionic plate. Resorption sites (lower right) shown in the same animal were characterized by loss of embryo and necrotic labyrinths (L) with variable necrosis in the trophoblast (T) layer. E, embryo; YS, yolk sac. Scale bars, 500  $\mu$ m.

(E) Immunohistochemical staining for CD3 in day E12.5 placentas from CNS1-sufficient (WT) and -deficient (KO) females. CD3<sup>+</sup> T cells (brown staining) are more numerous in the KO placentas in proximity to maternal spiral arteries (SA). Scale bars, 100  $\mu$ m.

See also [Figures S3](#), [S4](#), and [S5](#).

autoimmunity, the originally suggested sphere of their activity. Treg cells have been implicated in control of acute and chronic infections, tissue homeostasis at barrier sites populated by

commensal microbiota, allergy, injury response and tissue repair, metabolic syndrome, and cancer (reviewed in [Josefowicz et al., 2012](#)). In this study, we find that the *Fopx3* intronic

enhancer CNS1, essential for extrathymic differentiation of Treg cells, is present only in eutherian mammals, but not in marsupials or monotremes, and that pTreg cell paucity in CNS1-deficient females mated to MHC-mismatched males results in increased spontaneous abortion of embryos. An implication of these observations is that generation of Treg cells in the thymus does not afford adequate protection of the fetus expressing allogeneic MHC alleles from immune-mediated attack by maternal T cells. This latter notion is also supported by the comparable extent of embryo resorption associated with acute depletion of pTreg and pan-Treg ablation, i.e., elimination of both pTreg and tTreg cells. This finding implies that extrathymically generated Treg cells serve as the predominant subset mitigating maternal-fetal allogeneic conflict. We would propose that, once in place, extrathymic generation of Treg cells, primarily driven by the pressure to enforce maternal fetal tolerance, likely assumed additional functions, including control of responses to non-self antigens leading to allergy and asthma and to commensal organisms in the gut (Lathrop et al., 2011; Josefovicz et al., 2012).

Although pTreg cell deficiency in CNS1-deficient mice resulted in significantly increased resorption of fetuses during allogeneic pregnancy, its penetrance was incomplete. This was a rather expected result likely due to multiple mechanisms that operate during pregnancy to limit encounter of maternal alloreactive T cells with, or their response to, fetal alloantigens. These mechanisms include but are not limited to inactivation of immune cells by tryptophan deprivation by indoleamine 2,3-dioxygenases (Munn et al., 1998), Fas-Fas ligand-mediated apoptosis of activated alloreactive T cells (Hunt et al., 1997), expression of immunosuppressive mediators such as TGF- $\beta$  and galectin-1 (Simpson et al., 2002; Blois et al., 2007), entrapment of endometrial dendritic cells (Collins et al., 2009), limited expression of MHC molecules on trophoblasts (Erlebacher et al., 2007), and increased expression of inhibitory B7 family members (PD-L1, B7H3, B7H4) (reviewed in Petroff and Perchellet, 2010). It seems reasonable to suggest that pTreg-cell-mediated suppression enforces maternal-fetal tolerance not single handedly, but jointly with other numerous immunomodulatory mechanisms.

Additional factors, which could influence the degree of immune-mediated resorption associated with pTreg cell or pan-Treg cell deficiency include the genetic background, microbial status, and stress exposure. It is likely that, in the absence of pTreg cells, infection may result in a more severe pregnancy disruption. It must be also noted that the 3-week-long gestation period in mice is relatively short; extrathymic generation of Treg cells may play a more pronounced role in maternal-fetal tolerance in mammals with longer gestation times, for which there would be higher probability of the encounter of alloreactive T cells of the mother with paternally encoded alloantigens and for the immune response to develop.

The aforementioned possible influences affecting severity of pregnancy disruption and differences in experimental design might account for a varying degree of embryo resorption observed in our experiments and in previous reports employing adoptive T cell transfers and CD25-antibody-mediated Treg cell depletion in lymphopenic or lymphoreplete mice (Aluvihare

et al., 2004; Shima et al., 2010). However, we have encountered pervasive fetal death observed upon continuous DT-mediated ablation of Treg cells starting at midgestation daily, which was likely due to secondary effects of the poor health condition of the mother (Rowe et al., 2011).

Our demonstration of a key role of extrathymic generation of Treg cells in maternal-fetal tolerance substantially adds to previous studies demonstrating the general importance of Treg cells in control of maternal immune responses to the allogeneic fetus in mice. In humans, Treg cells are present in increased numbers during pregnancy in the blood and in the decidua (Heikinen et al., 2004; Somerset et al., 2004). Decreases in Treg cells have been associated with frequent human pregnancy disorders, including pre-eclampsia and repeated spontaneous abortions (Arruvito et al., 2009; Darmochwal-Kolarz et al., 2012). The histological features of allogeneic pregnancy in pTreg-cell-deficient females were redolent of abnormal spiral artery remodeling associated with pre-eclampsia and other complications of pregnancy in humans and accompanying increased local inflammation (Redman and Sargent, 2005; Avagliano et al., 2011; Renaud et al., 2011). These observations raise an intriguing possibility of a link between these conditions and impaired pTreg generation or function. Our study suggests that the reduced Treg accumulation and resulting pathology may be partially due to defective peripheral induction of Treg cells to paternal antigens, and potential therapies could be developed to address this defect.

The analysis of CNS1 sequence conservation suggests that this enhancer was gained during evolution of eutherian mammals. CNS1 contains binding sites for transcription factors downstream of three major signaling pathways required for pTreg generation, and its deletion results in a selective impairment of this differentiation process (Zheng et al., 2010). Thus, the introduction of this several hundred base-pair-long DNA sequence into the *Foxp3* locus could have been sufficient to enable the differentiation of pTreg cells. This line of reasoning implies that the increased interaction between the mother and fetus during gestation necessitated a mechanism of acquired active tolerance afforded by peripheral generation of regulatory T cells. Consistent with this idea, diminished litter size observed in allogeneic pregnancy in CNS1-deficient versus -sufficient females suggested that pTreg generation afforded a reproductive advantage.

The process of insertion of CNS1 sequence into the first intron of the *Foxp3* locus appears to have occurred via a MIR family retrotransposon activity during the Mesozoic era at a time overlapping with the evolution of placental mammals. We found that, in the mouse genome, MIR elements resembling CNS1 are enriched for SMAD- and RXR-binding sites (data not shown), suggesting that these elements may have endowed TGF- $\beta$  and retinoic acid response capacity to *Foxp3* and other genes, in agreement with the idea of exaptation, in which portions of transposable elements acquire a function that serves their host (Brosius and Gould, 1992). These elements can then confer novel signaling pathway responsiveness to existing genes, thereby augmenting their function. A mechanism of retrotransposon-mediated exaptation affecting the structure or regulation of pre-existing genes upon

introduction of novel exons or enhancers has been previously reported (Bejerano et al., 2006; Mikkelsen et al., 2007). We suggest that acquisition of CNS1 supporting extrathymic Treg cell generation in eutherian mammals represents an example of retrotransposon-mediated innovation in regulation of gene expression, whereby a distinct biological purpose and novel functionality associated with the CNS1 enhancer are implicit of the potential evolutionary pressure underlying its conservation.

It is noteworthy that the emergence of chorioallantoic placenta, which allowed for viviparity in therian mammals, was assisted by appropriation of several retroviral genes, including retrotransposon-derived Peg10 and Peg11/Rtl1 and syncytin-A and -B originating from the envelope protein of a defective retrovirus. These genes are essential for normal function of placenta and trophoblast fusion, respectively (Mi et al., 2000; Ono et al., 2006; Sekita et al., 2008; Dupressoir et al., 2011). Taken together, these results and our findings suggest that, in addition to facilitating placentation during mammalian evolution, retrotransposon-mediated innovation helped to alleviate immune conflict associated with this acquisition.

In conclusion, we suggest that the mechanism of extrathymic differentiation of Treg cells may have been gained during evolution to reinforce tolerance to paternal alloantigens presented by the fetus during the increasingly long gestation period in placental mammals. This adaptation was realized with the aid of the *Foxp3* CNS1 enhancer responsible for induction of *Foxp3* in peripheral CD4<sup>+</sup> *Foxp3*<sup>-</sup> T cells, which likely emerged upon capture of a MIR retrotransposon containing TGF- $\beta$  and retinoic acid receptor response elements. A role of extrathymically generated Treg cells in maternal-fetal tolerance may provide an important insight into potential clinical complications of human pregnancies.

## EXPERIMENTAL PROCEDURES

### Mouse Strains and Timed Matings

*Foxp3*<sup>GFP</sup>, *Foxp3*<sup>DTT</sup>, TEa, and CNS1-deficient mice on a B6 background were previously described (Grubin et al., 1997; Fontenot et al., 2005; Kim et al., 2007; Zheng et al., 2010). TCR $\beta$ -deficient B6 mice were purchased from Jackson Laboratory and maintained as a homozygous colony. All of the mice were bred and housed in the specific pathogen-free animal facility at the Memorial Sloan-Kettering Cancer Center and were used in accordance with institutional guidelines. Diphtheria toxin (DT) (Sigma) was administered twice i.p., as indicated.

### Timed Matings

One or two female mice were set up in the afternoon with individual males. Females were checked daily for the presence of a vaginal plug in the mornings, and plugged females were separated from males; the day of plug detection was considered day E0.5. Plugged females were analyzed for resorbed fetuses at E14.5, and the resorption was always analyzed in three different ways to confirm significance (see Statistical Analysis).

### Adoptive Cell Transfers

TEa CD4<sup>+</sup>*Foxp3*-negative (GFP<sup>-</sup>) cells were purified using an Aria2 cell sorter (BD Biosciences) after enrichment of CD4 cells using Dynal CD4 magnetic beads according to manufacturer instructions (Invitrogen).  $4 \times 10^6$  cells were injected i.v. into TCR $\beta$ -deficient B6 females, and the recipient mice were time mated with B6 or BALB/c males. Pregnant mice were analyzed on day E13.5.

### CNS1 Sequence Analysis

The *Foxp3* locus, including the 100 kb flanking sequence 5' and 3' of the *Foxp3* gene, was found in each species by ENSEMBL annotations. The most CNS1-like sequence in all species was determined by scanning for mouse CNS1 across the *Foxp3* locus using global-local alignment. For scoring alignments, there was no penalty for opening gaps, -1 for extending gaps or mismatched nucleotides, and +1 for matched nucleotides. All of CNS1 was aligned to a moving window twice the size of CNS1, and the window was moved to 50% of the size of CNS1. Genome-wide phylogenies were downloaded from <http://hgdownload.cse.ucsc.edu/goldenPath/hg19/phyloP46way/vertebrate.mod>, and branch lengths were scaled to the number of substitutions per site (Nikolaev et al., 2007; Pollard et al., 2010). Phylogenetic tree was unrooted, and the root was arbitrarily selected. The tree had two scales, as the distance between noneutherians is much larger than eutherians.

### Luciferase Assays

*Foxp3* luciferase expression constructs were generated using Infusion cloning system (Clontech) and were verified by restriction digests and sequencing.  $5 \times 10^6$  EL4-LAF cells were mixed with 5  $\mu$ g of indicated vector and 0.8  $\mu$ g of pRL-TK control vector in complete RPMI with 20% fetal bovine serum (FBS), and electroporation was performed using a Biorad electroporator (300V, 1000  $\mu$ F). Cells were rested for 15 min and then incubated in complete RPMI supplemented with 10% FBS for 1 hr before addition of PMA, ionomycin, and TGF $\beta$  (250 ng/ml, 25 ng/ml, and 4 ng/ml, respectively). After 18–24 hr cells were lysed, and dual luciferase activity was measured according to manufacturer instructions (Promega). Firefly luciferase activity levels were normalized to Renilla luciferase, and the resulting normalized values with stimulation were divided by those without to determine the stimulation dependent enhancement of promoter activity.

### Flow Cytometry

Single-cell suspensions from lymph nodes and spleen were prepared by mechanical disruption after dissection. Deciduas were isolated by careful dissection from the uterus and separation of the yolk sac containing the fetus followed by mechanical disruption. Fluorophore-conjugated antibodies were purchased from BD Biosciences and eBioscience. Intracellular *Foxp3* staining was performed using *Foxp3* mouse Treg cell staining kit (eBioscience). Stained cells were analyzed using an LSRII flow cytometer (BD Biosciences), and data were analyzed using FlowJo software (Treestar).

### Histological Analyses

Hematoxylin-, eosin-, and periodic acid Schiff-stained placental-fetal units from days E12.5 to E13.5 were examined histologically for qualitative changes to morphologically characterize early resorptions. Changes evaluated included clustered and thickened decidual spiral arteries, necrosis, thrombosis, edema, and inflammation in any placental layer and necrotic placenta sites that lacked embryos (resorptions). For each uterus, all intact placental sites were evaluated individually and scored for viability (resorptions) and prominence of clustered spiral arteries, necrosis in the metrial gland, and necrosis and inflammation in the trophoblast layer. A total of 6 WT uteri with 60 gestational sites and 7 KO uteri with 51 sites were examined.

### Immunohistochemical Methods

Placental-embryo units were stained with antibodies against CD3 (T cells; Clone CD3-12, AbD Serotec), F4/80 (macrophages; CALTAG), and CD31 (blood vessels; Abcam). Appropriate isotype controls and Bond Polymer Refine (DAB) detection kit including peroxide block, polymer, and hematoxylin (Leica) were used. Slides were qualitatively examined for signal detected by DAB staining (brown). Images were captured with Nikon Eclipse 80i with CFI plan apo-objectives and Nikon Digital Sight DS-Fi1 12 mega pixel camera and Nikon Basic Elements Software (Nikon). Raw images were edited for brightness in Adobe Photoshop Elements.

### Statistical Analysis

Unless otherwise noted, statistical analysis was performed using the unpaired two-tailed Student's t test with Welch's correction for unequal variances for individual biological replicates in Prism (GraphPad). The Fisher's exact test



was used to assess significance of the ratios of healthy and resorbed fetuses. This method assumes that each individual fetus represents an independent event due to physical separation of individual embryos from mother's alloreactive T cells and likely probabilistic factors affecting alloreactive T cell activation in the placenta. In support of the choice of the Fisher's exact test as the adequate way to analyze the data in question, we very rarely observed large numbers of resorbed embryos in a given female or strings of resorbing embryos, i.e., frequent resorptions of neighboring embryos. These observations suggested that resorption of each fetus seems to be an independent event with a considerable stochastic component. Nevertheless, to exclude the potential concern of nonindependence, we also performed the Fisher's exact test on the incidence of mothers having any resorption event. Lastly, the Student's *t* test was also used to compare the percent resorption of the fetuses in individual females. Nonparametric tests were also significant, but *p* values are not shown.

### SUPPLEMENTAL INFORMATION

Supplemental Information includes five figures and can be found with this article online at <http://dx.doi.org/10.1016/j.cell.2012.05.031>.

### ACKNOWLEDGMENTS

We would like to thank J. Gerard, Y. Liang, D. Canner, and M. Samstein; Z. Williams for helpful discussion; S. Gelber for review of histology; and P. Samollow and J. Vandeberg for providing opossum genomic DNA. R.M.S. was supported by NIH DK091968 and MSTP grant GM07739. A.Y.R. was supported by NIH grant R37 AI21609. A.Y.R. is an investigator with the Howard Hughes Medical Institute.

Received: April 18, 2012

Revised: April 26, 2012

Accepted: May 10, 2012

Published: July 5, 2012

### REFERENCES

- Aluvihare, V.R., Kallikourdis, M., and Betz, A.G. (2004). Regulatory T cells mediate maternal tolerance to the fetus. *Nat. Immunol.* *5*, 266–271.
- Arruvito, L., Billordo, A., Capucchio, M., Prada, M.E., and Fainboim, L. (2009). IL-6 trans-signaling and the frequency of CD4+FOXP3+ cells in women with reproductive failure. *J. Reprod. Immunol.* *82*, 158–165.
- Avagliano, L., Bulfamante, G.P., Morabito, A., and Marconi, A.M. (2011). Abnormal spiral artery remodelling in the decidual segment during pregnancy: from histology to clinical correlation. *J. Clin. Pathol.* *64*, 1064–1068.
- Bejerano, G., Lowe, C.B., Ahituv, N., King, B., Siepel, A., Salama, S.R., Rubin, E.M., Kent, W.J., and Haussler, D. (2006). A distal enhancer and an ultraconserved exon are derived from a novel retroposon. *Nature* *441*, 87–90.
- Blois, S.M., Ilarregui, J.M., Tometten, M., Garcia, M., Orsal, A.S., Cordero-Russo, R., Toscano, M.A., Bianco, G.A., Kobelt, P., Handjiski, B., et al. (2007). A pivotal role for galectin-1 in fetomaternal tolerance. *Nat. Med.* *13*, 1450–1457.
- Brosius, J., and Gould, S.J. (1992). On “genomenclature”: a comprehensive (and respectful) taxonomy for pseudogenes and other “junk DNA”. *Proc. Natl. Acad. Sci. USA* *89*, 10706–10710.
- Brunkow, M.E., Jeffery, E.W., Hjerrild, K.A., Paepker, B., Clark, L.B., Yasayko, S.A., Wilkinson, J.E., Galas, D., Ziegler, S.F., and Ramsdell, F. (2001). Disruption of a new forkhead/winged-helix protein, scurfy, results in the fatal lymphoproliferative disorder of the scurfy mouse. *Nat. Genet.* *27*, 68–73.
- Chatila, T.A., Blaesser, F., Ho, N., Lederman, H.M., Voulgaropoulos, C., Helms, C., and Bowcock, A.M. (2000). JM2, encoding a fork head-related protein, is mutated in X-linked autoimmunity-allergic dysregulation syndrome. *J. Clin. Invest.* *106*, R75–R81.
- Chen, W., Jin, W., Hardegen, N., Lei, K.-J., Li, L., Marinos, N., McGrady, G., and Wahl, S.M. (2003). Conversion of peripheral CD4+CD25- naive T cells to CD4+CD25+ regulatory T cells by TGF-beta induction of transcription factor Foxp3. *J. Exp. Med.* *198*, 1875–1886.
- Collins, M.K., Tay, C.-S., and Erlebacher, A. (2009). Dendritic cell entrapment within the pregnant uterus inhibits immune surveillance of the maternal/fetal interface in mice. *J. Clin. Invest.* *119*, 2062–2073.
- Darmochwal-Kolarz, D., Kludka-Sternik, M., Tabarkiewicz, J., Kolarz, B., Rolinski, J., Leszczynska-Gorzela, B., and Oleszczuk, J. (2012). The predominance of Th17 lymphocytes and decreased number and function of Treg cells in preeclampsia. *J. Reprod. Immunol.* *93*, 75–81.
- Dupressoir, A., Vernochet, C., Harper, F., Guégan, J., Dessen, P., Pierron, G., and Heidmann, T. (2011). A pair of co-opted retroviral envelope syncytin genes is required for formation of the two-layered murine placental syncytiotrophoblast. *Proc. Natl. Acad. Sci. USA* *108*, E1164–E1173.
- Erlebacher, A., Vencato, D., Price, K.A., Zhang, D., and Glimcher, L.H. (2007). Constraints in antigen presentation severely restrict T cell recognition of the allogeneic fetus. *J. Clin. Invest.* *117*, 1399–1411.
- Fontenot, J.D., Gavin, M.A., and Rudensky, A.Y. (2003). Foxp3 programs the development and function of CD4+CD25+ regulatory T cells. *Nat. Immunol.* *4*, 330–336.
- Fontenot, J.D., Rasmussen, J.P., Williams, L.M., Dooley, J.L., Farr, A.G., and Rudensky, A.Y. (2005). Regulatory T cell lineage specification by the forkhead transcription factor foxp3. *Immunity* *22*, 329–341.
- Gavin, M.A., Rasmussen, J.P., Fontenot, J.D., Vasta, V., Manganiello, V.C., Beavo, J.A., and Rudensky, A.Y. (2007). Foxp3-dependent programme of regulatory T-cell differentiation. *Nature* *445*, 771–775.
- Grubin, C.E., Kovats, S., deRoos, P., and Rudensky, A.Y. (1997). Deficient positive selection of CD4 T cells in mice displaying altered repertoires of MHC class II-bound self-peptides. *Immunity* *7*, 197–208.
- Hall, J.A., Grainger, J.R., Spencer, S.P., and Belkaid, Y. (2011). The role of retinoic acid in tolerance and immunity. *Immunity* *35*, 13–22.
- Heikkinen, J., Möttönen, M., Alanen, A., and Lassila, O. (2004). Phenotypic characterization of regulatory T cells in the human decidua. *Clin. Exp. Immunol.* *136*, 373–378.
- Hunt, J.S., Vassmer, D., Ferguson, T.A., and Miller, L. (1997). Fas ligand is positioned in mouse uterus and placenta to prevent trafficking of activated leukocytes between the mother and the conceptus. *J. Immunol.* *158*, 4122–4128.
- Josefowicz, S.Z., Niec, R.E., Kim, H.Y., Treuting, P., Chinen, T., Zheng, Y., Umetsu, D.T., and Rudensky, A.Y. (2012). Extrathymically generated regulatory T cells control mucosal TH2 inflammation. *Nature* *482*, 395–399.
- Jurka, J., Zietkiewicz, E., and Labuda, D. (1995). Ubiquitous mammalian-wide interspersed repeats (MIRs) are molecular fossils from the mesozoic era. *Nucleic Acids Res.* *23*, 170–175.
- Kim, J.M., Rasmussen, J.P., and Rudensky, A.Y. (2007). Regulatory T cells prevent catastrophic autoimmunity throughout the lifespan of mice. *Nat. Immunol.* *8*, 191–197.
- Kretschmer, K., Apostolou, I., Hawiger, D., Khazaie, K., Nussenzweig, M.C., and von Boehmer, H. (2005). Inducing and expanding regulatory T cell populations by foreign antigen. *Nat. Immunol.* *6*, 1219–1227.
- Lathrop, S.K., Bloom, S.M., Rao, S.M., Nutsch, K., Lio, C.-W., Santacruz, N., Peterson, D.A., Stappenbeck, T.S., and Hsieh, C.-S. (2011). Peripheral education of the immune system by colonic commensal microbiota. *Nature* *478*, 250–254.
- Lin, W., Haribhai, D., Relland, L.M., Truong, N., Carlson, M.R., Williams, C.B., and Chatila, T.A. (2007). Regulatory T cell development in the absence of functional Foxp3. *Nat. Immunol.* *8*, 359–368.
- Littman, D.R., and Rudensky, A.Y. (2010). Th17 and regulatory T cells in mediating and restraining inflammation. *Cell* *140*, 845–858.
- Margulies, E.H., Cooper, G.M., Asiminos, G., Thomas, D.J., Dewey, C.N., Siepel, A., Birney, E., Keefe, D., Schwartz, A.S., Hou, M., et al. (2007). Analyses of deep mammalian sequence alignments and constraint predictions for 1% of the human genome. *Genome Res.* *17*, 760–774.

- Mi, S., Lee, X., Li, X., Veldman, G.M., Finnerty, H., Racie, L., LaVallie, E., Tang, X.Y., Edouard, P., Howes, S., et al. (2000). Syncytin is a captive retroviral envelope protein involved in human placental morphogenesis. *Nature* 403, 785–789.
- Mikkelsen, T.S., Wakefield, M.J., Aken, B., Amemiya, C.T., Chang, J.L., Duke, S., Garber, M., Gentles, A.J., Goodstadt, L., Heger, A., et al; Broad Institute Genome Sequencing Platform; Broad Institute Whole Genome Assembly Team. (2007). Genome of the marsupial *Monodelphis domestica* reveals innovation in non-coding sequences. *Nature* 447, 167–177.
- Munn, D.H., Zhou, M., Attwood, J.T., Bondarev, I., Conway, S.J., Marshall, B., Brown, C., and Mellor, A.L. (1998). Prevention of allogeneic fetal rejection by tryptophan catabolism. *Science* 281, 1191–1193.
- Munoz-Suano, A., Hamilton, A.B., and Betz, A.G. (2011). Gimme shelter: the immune system during pregnancy. *Immunol. Rev.* 241, 20–38.
- Nikolaev, S., Montoya-Burgos, J.I., Margulies, E.H., Rougemont, J., Nyffeler, B., and Antonarakis, S.E.; NISC Comparative Sequencing Program. (2007). Early history of mammals is elucidated with the ENCODE multiple species sequencing data. *PLoS Genet.* 3, e2.
- Ono, R., Nakamura, K., Inoue, K., Naruse, M., Usami, T., Wakisaka-Saito, N., Hino, T., Suzuki-Migishima, R., Ogonuki, N., Miki, H., et al. (2006). Deletion of *Peg10*, an imprinted gene acquired from a retrotransposon, causes early embryonic lethality. *Nat. Genet.* 38, 101–106.
- Petroff, M.G., and Perchellet, A. (2010). B7 family molecules as regulators of the maternal immune system in pregnancy. *Am. J. Reprod. Immunol.* 63, 506–519.
- Pollard, K.S., Hubisz, M.J., Rosenbloom, K.R., and Siepel, A. (2010). Detection of nonneutral substitution rates on mammalian phylogenies. *Genome Res.* 20, 110–121.
- Quintana, F.J., Iglesias, A.H., Farez, M.F., Caccamo, M., Burns, E.J., Kassam, N., Oukka, M., and Weiner, H.L. (2010). Adaptive autoimmunity and *Foxp3*-based immunoregulation in zebrafish. *PLoS ONE* 5, e9478.
- Redman, C.W., and Sargent, I.L. (2005). Latest advances in understanding preeclampsia. *Science* 308, 1592–1594.
- Renaud, S.J., Cotechini, T., Quirt, J.S., Macdonald-Goodfellow, S.K., Othman, M., and Graham, C.H. (2011). Spontaneous pregnancy loss mediated by abnormal maternal inflammation in rats is linked to deficient uteroplacental perfusion. *J. Immunol.* 186, 1799–1808.
- Rowe, J.H., Ertelt, J.M., Aguilera, M.N., Farrar, M.A., and Way, S.S. (2011). *Foxp3*(+) regulatory T cell expansion required for sustaining pregnancy compromises host defense against prenatal bacterial pathogens. *Cell Host Microbe* 10, 54–64.
- Sekita, Y., Wagatsuma, H., Nakamura, K., Ono, R., Kagami, M., Wakisaka, N., Hino, T., Suzuki-Migishima, R., Kohda, T., Ogura, A., et al. (2008). Role of retrotransposon-derived imprinted gene, *Rtl1*, in the feto-maternal interface of mouse placenta. *Nat. Genet.* 40, 243–248.
- Shima, T., Sasaki, Y., Itoh, M., Nakashima, A., Ishii, N., Sugamura, K., and Saito, S. (2010). Regulatory T cells are necessary for implantation and maintenance of early pregnancy but not late pregnancy in allogeneic mice. *J. Reprod. Immunol.* 85, 121–129.
- Simpson, H., Robson, S.C., Bulmer, J.N., Barber, A., and Lyall, F. (2002). Transforming growth factor beta expression in human placenta and placental bed during early pregnancy. *Placenta* 23, 44–58.
- Smit, A.F., and Riggs, A.D. (1995). MIRs are classic, tRNA-derived SINES that amplified before the mammalian radiation. *Nucleic Acids Res.* 23, 98–102.
- Somerset, D.A., Zheng, Y., Kilby, M.D., Sansom, D.M., and Drayson, M.T. (2004). Normal human pregnancy is associated with an elevation in the immune suppressive CD25+ CD4+ regulatory T-cell subset. *Immunology* 112, 38–43.
- Tone, Y., Furuuchi, K., Kojima, Y., Tykocinski, M.L., Greene, M.I., and Tone, M. (2008). *Smad3* and *NFAT* cooperate to induce *Foxp3* expression through its enhancer. *Nat. Immunol.* 9, 194–202.
- Wildin, R.S., Ramsdell, F., Peake, J., Faravelli, F., Casanova, J.L., Buist, N., Levy-Lahad, E., Mazzella, M., Goulet, O., Perroni, L., et al. (2001). X-linked neonatal diabetes mellitus, enteropathy and endocrinopathy syndrome is the human equivalent of mouse scurfy. *Nat. Genet.* 27, 18–20.
- Winger, E.E., and Reed, J.L. (2011). Low circulating CD4(+) CD25(+) *Foxp3*(+) T regulatory cell levels predict miscarriage risk in newly pregnant women with a history of failure. *Am. J. Reprod. Immunol.* 66, 320–328.
- Xu, L., Kitani, A., Stuelten, C., McGrady, G., Fuss, I., and Strober, W. (2010). Positive and negative transcriptional regulation of the *Foxp3* gene is mediated by access and binding of the *Smad3* protein to enhancer I. *Immunity* 33, 313–325.
- Zheng, S.G., Wang, J.H., Gray, J.D., Soucier, H., and Horwitz, D.A. (2004). Natural and induced CD4+CD25+ cells educate CD4+CD25- cells to develop suppressive activity: the role of IL-2, TGF-beta, and IL-10. *J. Immunol.* 172, 5213–5221.
- Zheng, Y., Josefowicz, S., Chaudhry, A., Peng, X.P., Forbush, K., and Rudensky, A.Y. (2010). Role of conserved non-coding DNA elements in the *Foxp3* gene in regulatory T-cell fate. *Nature* 463, 808–812.

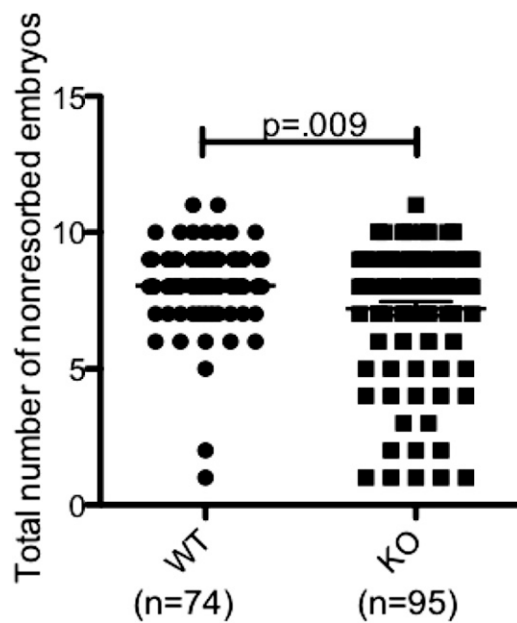

**Figure S1. CNS1 Deficiency Results in Decreased Numbers of Viable Embryos, Related to Figure 3**

Total number of nonresorbed embryos observed in CNS1-sufficient (WT) and -deficient (KO) pregnant mice sired by BALB/c males at day E13-14.5.

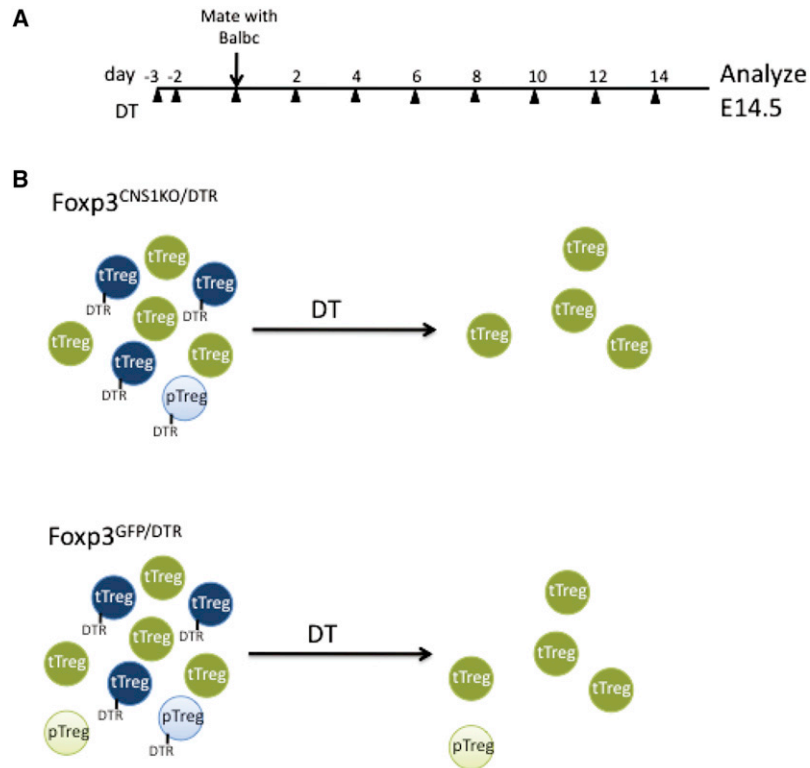

**Figure S2. Experimental Design for Acute DT-Mediated Ablation of CNS1-Sufficient Treg Cells in Heterozygous *Foxp3<sup>CNS1KO/DTR</sup>* Females, Related to Figure 4**

(A) Timeline of DT treatments (arrowheads) and mating. Mice were treated with diphtheria toxin (DT) 3 days before mating and continuously throughout mating and pregnancy.

(B) Heterozygous *Foxp3<sup>CNS1KO/DTR</sup>* and *Foxp3<sup>GFP/DTR</sup>* females containing one copy of *Foxp3<sup>DTR</sup>* and CNS1 KO (*Foxp3<sup>CNS1KO</sup>*) or *Foxp3<sup>GFP</sup>* (control) allele each, respectively. Due to random X chromosome inactivation Treg cells express Foxp3 from either the *Foxp3<sup>DTR</sup>* allele or the *Foxp3<sup>CNS1KO</sup>* allele. Administration of DT to these mice results in ablation of 50% of the thymic Treg cells that contain the DTR allele and all of the pTreg cells.

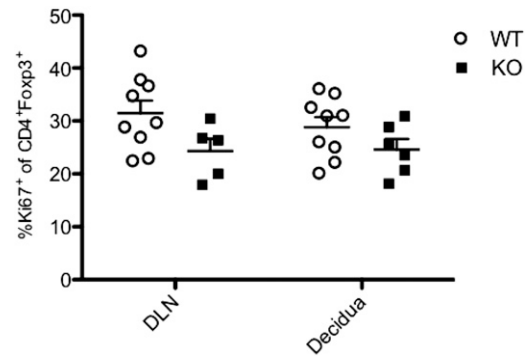

**Figure S3. Lack of Compensatory Proliferation of Thymic Treg Cells in Pregnant CNS1-Deficient Females, Related to Figure 5**

Proliferative activity in Treg cell subsets in the draining lymph node (DLN) and decidua during allogeneic pregnancy of CNS1-sufficient (WT) and -deficient (KO) mice was assessed by intracellular Ki67 staining. Data are shown as percent of Foxp3+ Treg cells staining positive for Ki67.

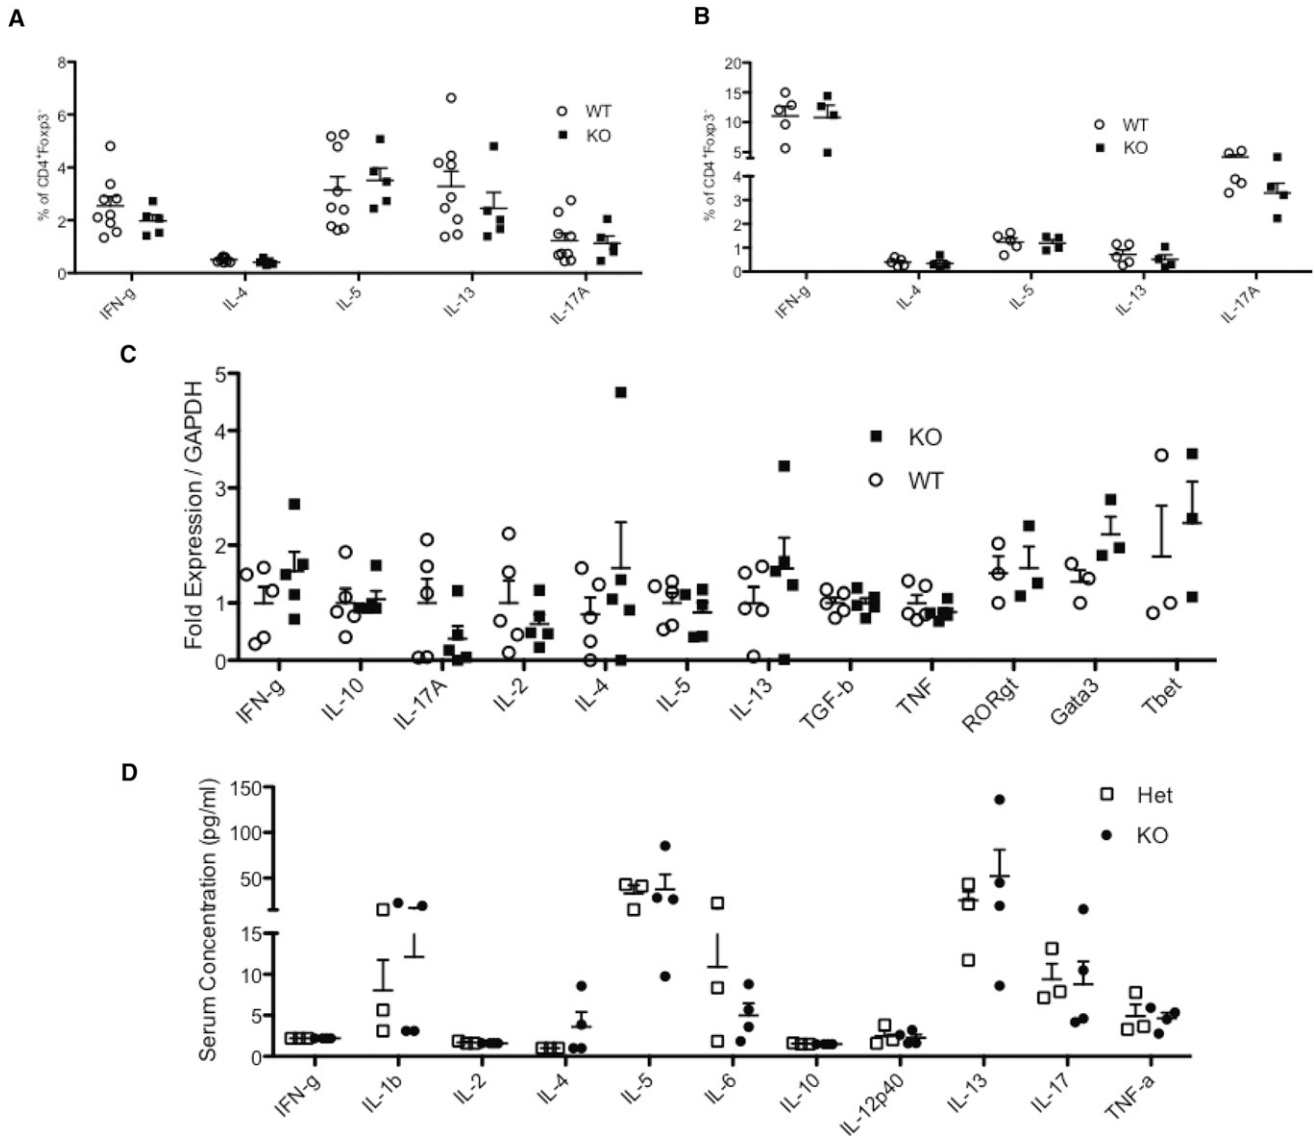

**Figure S4. Analysis of Effector Cytokine Production during Allogeneic Pregnancy in CNS1-Sufficient and -Deficient Mice, Related to Figure 5**

(A) Percent of Foxp3-negative CD4<sup>+</sup> cells in the draining lymph node of pregnant CNS1 WT and CNS1 KO mice expressing the indicated cytokines as measured by intracellular cytokine staining after ex vivo stimulation with PMA/ionomycin for 5 hr.

(B) Percent of Foxp3-negative CD4<sup>+</sup> cells in the decidua of pregnant CNS1 WT and CNS1 KO mice expressing the indicated cytokines as measured by intracellular cytokine staining after ex vivo stimulation with PMA/ionomycin for 5 hr.

(C) Fold expression of indicated cytokine and transcription factor mRNAs normalized to GAPDH in CNS1 WT and CNS1 KO mice measured by quantitative RT-PCR using total RNA isolated from decidua of allogeneic mated mice.

(D) Serum levels of indicated cytokines measured in *Foxp3*<sup>WT/CNS1KO</sup> (Het) and *Foxp3*<sup>CNS1KO/CNS1KO</sup> (KO) pregnant females using Milliplex multi-analyte assay.

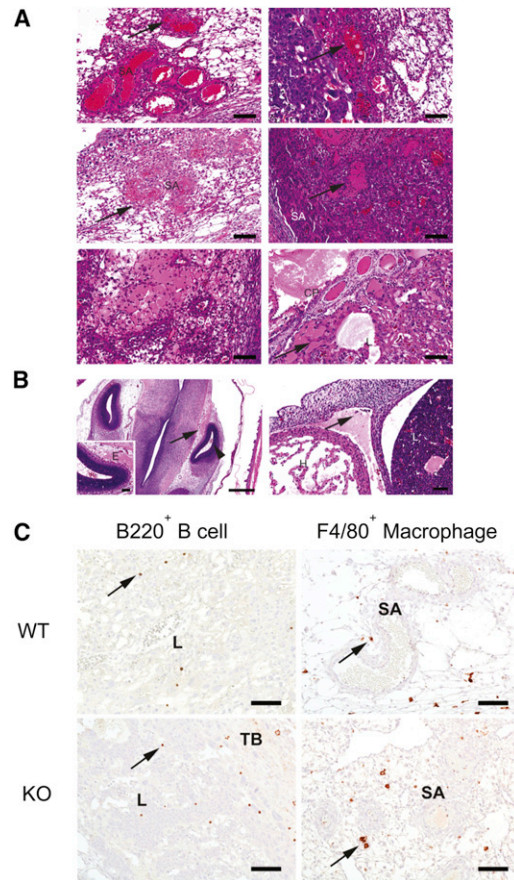

**Figure S5. Histopathology of Placentas and Embryos in CNS1-Deficient Females Mated with BALB/c Males, Related to Figure 5**

(A) Representative HE-stained sections of CNS1KO placentas are shown. In ED12.5 KO decidua, maternal spiral arteries (SA) with thickened walls were more frequently noted in clusters with occasional early regions of necrosis (arrows, top row). At ED13.5 days, in viable placenta there were occasional degenerative to necrotic spiral arteries (arrow, middle left). In resorption sites (see also Figures 3a and 5d) there is extensive thrombosis and necrosis of the vasculature (arrow, middle right). Edema (lower row) is occasionally noted in ED13.5 placenta with early degeneration within the decidua basalis surrounding SA (lower left) and in one instance at the chorionic plate (CP) and labyrinth (L) (arrow, lower right). Scale bars = 100 $\mu$ m.

(B) Representative HE-stained sections of ED13.5 CNS1KO embryo demonstrate early degeneration along with placental changes. There is edema (arrow, left; E inset) in the connective tissues adjacent to an optic cup where there is focal hemorrhage (arrow). Scale bar = 500 $\mu$ m. Inset: higher magnification of the affected optic cup. Scale bar = 50 $\mu$ m. Within the same embryo, there is edema and mild hemorrhage within the thorax; heart (H) and liver (L) are indicated. Scale bar = 50 $\mu$ m.

(C) Representative images of histological staining using B220 (CD45R) and F4/80 antibodies in CNS1 WT and CNS1 KO deciduas demonstrating no major increase in the numbers of B cells and macrophages respectively. Scale bars = 100 $\mu$ m.
